# Supplementary material
Source: PubMed Central journal article supplement (PMC6297108)
Supplement: 13280_2018_1055_MOESM1_ESM.pdf [file 13280_2018_1055_MOESM1_ESM.pdf]

*Ambio*

Electronic Supplementary Material

*This supplementary material has not been peer reviewed.*

**Title: Shepherds' local knowledge and scientific data on the scavenging ecosystem service: Insights for conservation**

Authors: Zebensui Morales-Reyes, Berta Martín-López, Marcos Moleón, Patricia Mateo-Tomás, Pedro P. Olea, Eneko Arrondo, José A. Donázar, José A. Sánchez-Zapata

This file includes:

**Table S1.** Species included in the questionnaires in each study area.

**Table S2.** Overview of the variables and questions included in the questionnaires to investigate shepherds' indigenous and local knowledge.

**Table S3.** Overview of the variables of scientific knowledge.

**Table S4.** Analysis of covariance testing the effects of the shepherds' age on the relationships between SK and ILK at the species level in each study area.

**Table S5.** Analysis of covariance testing the effects of the experience as a shepherd on the relationships between SK and ILK at the species level in each study area.

**Table S6.** *U* values and *p* value of Mann-Whitney *U* tests of the differences between scientific knowledge and indigenous and local knowledge about detection and consumption times of livestock carcasses by scavengers depending on shepherds' age and experience in each study area.

**Appendix S1.** Calculation of the biomass consumed by each vertebrate scavenger species in each study area.

**Table S1.** Species included in the questionnaires in each study area. Vertebrate scavenger species detected in the monitoring of the consumption of carcasses using camera traps and/or other scavenger species breeding in each study area were included.

| Scientific name              | Common name       | Cantabrian Mountains | Baetic Mountains |
|------------------------------|-------------------|----------------------|------------------|
| <b>Birds</b>                 |                   |                      |                  |
| <i>Aegypius monachus</i>     | Cinereous vulture | Yes                  | Yes              |
| <i>Gypaetus barbatus</i>     | Bearded vulture   | No                   | Yes              |
| <i>Gyps fulvus</i>           | Griffon vulture   | Yes                  | Yes              |
| <i>Neophron percnopterus</i> | Egyptian vulture  | Yes                  | Yes              |
| <i>Aquila chrysaetos</i>     | Golden eagle      | Yes                  | Yes              |
| <i>Buteo buteo</i>           | Common buzzard    | Yes                  | No               |
| <i>Milvus migrans</i>        | Black kite        | No                   | Yes              |
| <i>Milvus milvus</i>         | Red kite          | Yes                  | Yes              |
| <i>Corvus corax</i>          | Common raven      | Yes                  | Yes              |
| <i>Corvus corone</i>         | Carrion crow      | Yes                  | Yes              |
| <i>Garrulus glandarius</i>   | Eurasian jay      | Yes                  | No               |
| <i>Pica pica</i>             | Common magpie     | Yes                  | Yes              |
| <b>Mammals</b>               |                   |                      |                  |
| <i>Ursus arctos</i>          | Brown bear        | Yes                  | No               |
| <i>Canis lupus</i>           | Gray wolf         | Yes                  | No               |
| <i>Vulpes vulpes</i>         | Red fox           | Yes                  | Yes              |
| <i>Genetta genetta</i>       | Common genet      | Yes                  | No               |
| <i>Martes foina</i> *        | Stone marten      | Yes                  | Yes              |
| <i>Martes martes</i> *       | Pine marten       | Yes                  | No               |
| <i>Meles meles</i>           | Eurasian badger   | Yes                  | No               |
| <i>Sus scrofa</i>            | Wild boar         | Yes                  | Yes              |

\* In Cantabrian Mountains, we considered stone marten (*Martes foina*) and pine marten (*M. martes*) together as *Martes spp.* because specific identification was not possible from the pictures at night (n = 1 carcass).

**Table S2.** Overview of the variables and questions included in the questionnaires to investigate shepherds' indigenous and local knowledge (ILK).

| <b>Variable</b>                          | <b>Description</b>                                                                                                                                                                                                                                                                                                                                                       |
|------------------------------------------|--------------------------------------------------------------------------------------------------------------------------------------------------------------------------------------------------------------------------------------------------------------------------------------------------------------------------------------------------------------------------|
| <b>Species level</b>                     |                                                                                                                                                                                                                                                                                                                                                                          |
| Frequency of occurrence at carcasses ILK | For each species, average frequency of observation by shepherds of such species scavenging at carcasses in each study area, according to the following categories: 0 (never), 1 (less than half the times), 2 (half the times), 3 (more than half the times) and 4 (always). Question: how often do you see each species scavenging at livestock carcasses in your area? |
| Scavenging service ILK                   | For each species, percentage of shepherds that considered such species as a provider of the scavenging service (i.e., carcass consumption). Ln (x+1) transformation was applied to avoid heteroscedasticity. Questions: which species scavenge your livestock carcasses? Could you rank each species by its importance in the removal of your livestock carcasses?       |
| <b>Community level</b>                   |                                                                                                                                                                                                                                                                                                                                                                          |
| Detection time ILK                       | For each livestock carcass, average perception of the time elapsed (in hours) since the carcass became available until the arrival of the first scavenger. Question: how long do scavengers normally take to detect a carcass?                                                                                                                                           |
| Consumption time ILK                     | For each livestock carcass, average perception of the time elapsed (in hours) since the carcass became available until it was completely consumed (i.e., only bones, skin and dehydrated meat left; Moleón et al. 2015). Question: how long do scavengers normally take to completely consume a carcass?                                                                 |

**Table S3.** Overview of the variables of scientific knowledge (SK).

| <b>Name of variable</b>                 | <b>Description</b>                                                                                                                                                                                                                                                                            |
|-----------------------------------------|-----------------------------------------------------------------------------------------------------------------------------------------------------------------------------------------------------------------------------------------------------------------------------------------------|
| <b>Species level</b>                    |                                                                                                                                                                                                                                                                                               |
| Frequency of occurrence at carcasses SK | For each species, average frequency of occurrence of such species feeding on the carcasses within each study area. Variable obtained from camera trap monitoring of carcass consumption (Mateo-Tomás et al. 2015).                                                                            |
| Biomass consumed SK                     | For each species, average percentage of biomass consumed by such species at all the carcasses in each study area. See Appendix S1 for further details. Variable obtained from camera trap monitoring of carcass consumption. Ln (x+1) transformation was applied to avoid heteroscedasticity. |
| <b>Community level</b>                  |                                                                                                                                                                                                                                                                                               |
| Detection time SK                       | For each experimental carcass, average time elapsed (in hours) since the carcass became available until the arrival of the first scavenger. Variable obtained from camera trap monitoring of carcass consumption.                                                                             |
| Consumption time SK                     | For each experimental carcass, average time elapsed (in hours) since the carcass became available until it was completely consumed (i.e., only bones, skin and dehydrated meat left; Moleón et al. 2015). Variable obtained from camera trap monitoring of carcass consumption.               |

**Table S4.** Analysis of covariance testing the effects of the shepherds' age ('born' as covariate) on the relationships between scientific knowledge (i.e., 'frequency of occurrence at carcasses SK' and 'biomass consumed SK') and indigenous and local knowledge (i.e., 'frequency of occurrence at carcasses ILK' and 'scavenging service ILK') at the species level in each study area. Values statistically significant are indicated in bold. Description of the variables is provided in Table S2 and S3. The regression lines are provided in Figs. 4a–b.

| Study area                  | SK-ILK                                                                             | Analysis of covariance table                              | DF                                  | Sum             | Sq mean         | F value        | Pr (>F)             |                     |
|-----------------------------|------------------------------------------------------------------------------------|-----------------------------------------------------------|-------------------------------------|-----------------|-----------------|----------------|---------------------|---------------------|
| Cantabrian Mountains        | Frequency of occurrence at carcasses SK - Frequency of occurrence at carcasses ILK | Frequency of occurrence at carcasses ILK                  | 1                                   | 1.425           | 1.425           | 16.969         | < <b>0.001</b>      |                     |
|                             |                                                                                    | Born                                                      | 2                                   | 0.024           | 0.012           | 0.142          | 0.868               |                     |
|                             |                                                                                    | Frequency of occurrence at carcasses ILK:Born             | 2                                   | 0.123           | 0.062           | 0.734          | 0.485               |                     |
|                             |                                                                                    | Residuals                                                 | 46                                  | 3.863           | 0.084           |                |                     |                     |
|                             |                                                                                    | <b>Estimated coefficients</b>                             |                                     |                 | <b>Estimate</b> | <b>SE</b>      | <b>t value</b>      | <b>Pr (&gt; t )</b> |
|                             |                                                                                    | Intercept                                                 |                                     | 0.235           | 0.076           | 3.084          | <b>0.003</b>        |                     |
|                             |                                                                                    | Frequency of occurrence at carcasses ILK                  |                                     | 0.225           | 0.111           | 2.022          | <b>0.049</b>        |                     |
|                             |                                                                                    | Born $\geq$ 1970                                          |                                     | -0.102          | 0.113           | -0.897         | 0.374               |                     |
|                             |                                                                                    | Born 1960                                                 |                                     | -0.018          | 0.109           | -0.162         | 0.872               |                     |
|                             |                                                                                    | Frequency of occurrence at carcasses ILK:Born $\geq$ 1970 |                                     | 0.121           | 0.158           | 0.762          | 0.450               |                     |
|                             |                                                                                    | Frequency of occurrence at carcasses ILK:Born 1960        |                                     | -0.046          | 0.137           | -0.334         | 0.740               |                     |
|                             |                                                                                    | <b>SK-ILK</b>                                             | <b>Analysis of covariance table</b> | <b>DF</b>       | <b>Sum</b>      | <b>Sq mean</b> | <b>F value</b>      | <b>Pr (&gt;F)</b>   |
|                             | Biomass consumed SK - Scavenging service ILK                                       | Scavenging service ILK                                    | Scavenging service ILK              | 1               | 58.325          | 58.325         | 242.552             | < <b>0.0001</b>     |
| Born                        |                                                                                    |                                                           | 2                                   | 0.092           | 0.046           | 0.191          | 0.827               |                     |
| Scavenging service ILK:Born |                                                                                    |                                                           | 2                                   | 0.502           | 0.251           | 1.044          | 0.360               |                     |
| Residuals                   |                                                                                    |                                                           | 46                                  | 11.061          | 0.240           |                |                     |                     |
|                             |                                                                                    | <b>Estimated coefficients</b>                             |                                     | <b>Estimate</b> | <b>SE</b>       | <b>t value</b> | <b>Pr (&gt; t )</b> |                     |
|                             |                                                                                    | Intercept                                                 |                                     | 0.223           | 0.145           | 1.537          | 0.131               |                     |
|                             |                                                                                    | Scavenging service ILK                                    |                                     | 0.690           | 0.075           | 9.258          | < <b>0.0001</b>     |                     |
|                             | Born $\geq$ 1970                                                                   |                                                           | -0.036                              | 0.202           | -0.178          | 0.860          |                     |                     |
|                             | Born 1960                                                                          |                                                           | 0.063                               | 0.206           | 0.303           | 0.763          |                     |                     |

|                     |                                                                                                   |                                                           |           |                 |                |                |                     |
|---------------------|---------------------------------------------------------------------------------------------------|-----------------------------------------------------------|-----------|-----------------|----------------|----------------|---------------------|
|                     |                                                                                                   | Scavenging service ILK:Born $\geq$ 1970                   |           | -0.033          | 0.101          | -0.328         | 0.744               |
|                     |                                                                                                   | Scavenging service ILK:Born 1960                          |           | -0.136          | 0.100          | -1.358         | 0.181               |
|                     | <b>SK-ILK</b>                                                                                     | <b>Analysis of covariance table</b>                       | <b>DF</b> | <b>Sum</b>      | <b>Sq mean</b> | <b>F value</b> | <b>Pr (&gt;F)</b>   |
| Baetic<br>Mountains | Frequency of<br>occurrence at<br>carcasses SK -<br>Frequency of<br>occurrence at<br>carcasses ILK | Frequency of occurrence at carcasses ILK                  | 1         | 1.712           | 1.712          | 24.201         | < <b>0.0001</b>     |
|                     |                                                                                                   | Born                                                      | 2         | 0.034           | 0.017          | 0.241          | 0.788               |
|                     |                                                                                                   | Frequency of occurrence at carcasses ILK:Born             | 2         | 0.046           | 0.023          | 0.327          | 0.723               |
|                     |                                                                                                   | Residuals                                                 | 31        | 2.193           | 0.071          |                |                     |
|                     |                                                                                                   | <b>Estimated coefficients</b>                             |           | <b>Estimate</b> | <b>SE</b>      | <b>t value</b> | <b>Pr (&gt; t )</b> |
|                     |                                                                                                   | Intercept                                                 |           | 0.194           | 0.110          | 1.759          | 0.088               |
|                     |                                                                                                   | Frequency of occurrence at carcasses ILK                  |           | 0.109           | 0.049          | 2.200          | <b>0.035</b>        |
|                     |                                                                                                   | Born $\geq$ 1970                                          |           | -0.139          | 0.153          | -0.904         | 0.373               |
|                     |                                                                                                   | Born 1960                                                 |           | -0.145          | 0.156          | -0.931         | 0.359               |
|                     |                                                                                                   | Frequency of occurrence at carcasses ILK:Born $\geq$ 1970 |           | 0.050           | 0.070          | 0.717          | 0.479               |
|                     | Frequency of occurrence at carcasses ILK:Born 1960                                                |                                                           | 0.048     | 0.070           | 0.681          | 0.501          |                     |
|                     | <b>SK-ILK</b>                                                                                     | <b>Analysis of covariance table</b>                       | <b>DF</b> | <b>Sum</b>      | <b>Sq mean</b> | <b>F value</b> | <b>Pr (&gt;F)</b>   |
|                     | Biomass<br>consumed SK -<br>Scavenging<br>service ILK                                             | Scavenging service ILK                                    | 1         | 21.479          | 21.479         | 18.172         | < <b>0.001</b>      |
|                     |                                                                                                   | Born                                                      | 2         | 0.112           | 0.056          | 0.048          | 0.954               |
|                     |                                                                                                   | Scavenging service ILK:Born                               | 2         | 0.007           | 0.003          | 0.003          | 0.997               |
|                     |                                                                                                   | Residuals                                                 | 31        | 36.643          | 1.182          |                |                     |
|                     |                                                                                                   | <b>Estimated coefficients</b>                             |           | <b>Estimate</b> | <b>SE</b>      | <b>t value</b> | <b>Pr (&gt; t )</b> |
|                     |                                                                                                   | Intercept                                                 |           | 0.026           | 0.440          | 0.060          | 0.953               |
|                     |                                                                                                   | Scavenging service ILK                                    |           | 0.427           | 0.167          | 2.562          | <b>0.016</b>        |
|                     |                                                                                                   | Born $\geq$ 1970                                          |           | -0.100          | 0.614          | -0.163         | 0.872               |
|                     |                                                                                                   | Born 1960                                                 |           | -0.090          | 0.612          | -0.147         | 0.884               |
|                     |                                                                                                   | Scavenging service ILK:Born $\geq$ 1970                   |           | -0.018          | 0.238          | -0.075         | 0.941               |
|                     | Scavenging service ILK:Born 1960                                                                  |                                                           | -0.008    | 0.241           | -0.032         | 0.975          |                     |

**Table S5.** Analysis of covariance testing the effects of the experience as a shepherd ('experience' as covariate) on the relationships between scientific knowledge (i.e., 'frequency of occurrence at carcasses SK' and 'biomass consumed SK') and indigenous and local knowledge (i.e., 'frequency of occurrence at carcasses ILK' and 'scavenging service ILK') at the species level in each study area. Values statistically significant are indicated in bold. Description of the variables is provided in Table S2 and S3. The regression lines are provided in Figs. 4c–d.

| Study area                                              | SK-ILK                                                                             | Analysis of covariance table                        | DF     | Sum             | Sq mean   | F value        | Pr (>F)             |
|---------------------------------------------------------|------------------------------------------------------------------------------------|-----------------------------------------------------|--------|-----------------|-----------|----------------|---------------------|
| Cantabrian Mountains                                    | Frequency of occurrence at carcasses SK - Frequency of occurrence at carcasses ILK | Frequency of occurrence at carcasses ILK            | 1      | 1.477           | 1.477     | 17.235         | < <b>0.001</b>      |
|                                                         |                                                                                    | Experience                                          | 2      | 0.024           | 0.012     | 0.139          | 0.871               |
|                                                         |                                                                                    | Frequency of occurrence at carcasses ILK:Experience | 2      | 0.042           | 0.021     | 0.248          | 0.782               |
|                                                         |                                                                                    | Residuals                                           | 45     | 3.855           | 0.086     |                |                     |
|                                                         | <b>Estimated coefficients</b>                                                      |                                                     |        | <b>Estimate</b> | <b>SE</b> | <b>t value</b> | <b>Pr (&gt; t )</b> |
|                                                         | Intercept                                                                          |                                                     |        | 0.201           | 0.081     | 2.479          | <b>0.017</b>        |
|                                                         | Frequency of occurrence at carcasses ILK                                           |                                                     |        | 0.307           | 0.130     | 2.352          | <b>0.023</b>        |
|                                                         | Experience 21-40                                                                   |                                                     |        | -0.033          | 0.114     | -0.288         | 0.775               |
|                                                         | Experience ≥41                                                                     |                                                     |        | 0.032           | 0.114     | 0.278          | 0.782               |
|                                                         | Frequency of occurrence at carcasses ILK:Experience 21-40                          |                                                     |        | -0.053          | 0.159     | -0.334         | 0.740               |
| Frequency of occurrence at carcasses ILK:Experience ≥41 |                                                                                    |                                                     | -0.109 | 0.160           | -0.683    | 0.498          |                     |
|                                                         | SK-ILK                                                                             | Analysis of covariance table                        | DF     | Sum             | Sq mean   | F value        | Pr (>F)             |
|                                                         | Biomass consumed SK - Scavenging service ILK                                       | Scavenging service ILK                              | 1      | 60.495          | 60.495    | 305.443        | < <b>0.0001</b>     |
|                                                         |                                                                                    | Experience                                          | 2      | 0.014           | 0.007     | 0.036          | 0.964               |
|                                                         |                                                                                    | Scavenging service ILK:Experience                   | 2      | 0.149           | 0.074     | 0.376          | 0.689               |
|                                                         |                                                                                    | Residuals                                           | 46     | 9.111           | 0.198     |                |                     |
|                                                         | <b>Estimated coefficients</b>                                                      |                                                     |        | <b>Estimate</b> | <b>SE</b> | <b>t value</b> | <b>Pr (&gt; t )</b> |
|                                                         | Intercept                                                                          |                                                     |        | 0.189           | 0.133     | 1.425          | 0.161               |
|                                                         | Scavenging service ILK                                                             |                                                     |        | 0.664           | 0.064     | 10.419         | < <b>0.0001</b>     |
|                                                         | Experience 21-40                                                                   |                                                     |        | 0.062           | 0.184     | 0.337          | 0.737               |
| Experience ≥41                                          |                                                                                    |                                                     | 0.020  | 0.187           | 0.106     | 0.916          |                     |

|                  |                                                                                    |                                                               |           |                 |                |                |                     |
|------------------|------------------------------------------------------------------------------------|---------------------------------------------------------------|-----------|-----------------|----------------|----------------|---------------------|
|                  |                                                                                    | Scavenging service ILK:Experience 21-40                       |           | -0.063          | 0.089          | -0.707         | 0.483               |
|                  |                                                                                    | Scavenging service ILK:Experience $\geq$ 41                   |           | 0.008           | 0.092          | 0.084          | 0.934               |
|                  | <b>SK-ILK</b>                                                                      | <b>Analysis of covariance table</b>                           | <b>DF</b> | <b>Sum</b>      | <b>Sq mean</b> | <b>F value</b> | <b>Pr (&gt;F)</b>   |
| Baetic Mountains | Frequency of occurrence at carcasses SK - Frequency of occurrence at carcasses ILK | Frequency of occurrence at carcasses ILK                      | 1         | 1.971           | 1.971          | 30.154         | < <b>0.0001</b>     |
|                  |                                                                                    | Experience                                                    | 2         | 0.022           | 0.011          | 0.169          | 0.845               |
|                  |                                                                                    | Frequency of occurrence at carcasses ILK:Experience           | 2         | 0.001           | 0.001          | 0.009          | 0.992               |
|                  |                                                                                    | Residuals                                                     | 32        | 2.092           | 0.065          |                |                     |
|                  |                                                                                    | <b>Estimated coefficients</b>                                 |           | <b>Estimate</b> | <b>SE</b>      | <b>t value</b> | <b>Pr (&gt; t )</b> |
|                  |                                                                                    | Intercept                                                     |           | 0.088           | 0.109          | 0.806          | 0.426               |
|                  |                                                                                    | Frequency of occurrence at carcasses ILK                      |           | 0.150           | 0.049          | 3.037          | <b>0.005</b>        |
|                  |                                                                                    | Experience 21-40                                              |           | -0.011          | 0.147          | -0.074         | 0.941               |
|                  |                                                                                    | Experience $\geq$ 41                                          |           | -0.053          | 0.155          | -0.342         | 0.735               |
|                  |                                                                                    | Frequency of occurrence at carcasses ILK:Experience 21-40     |           | 0.008           | 0.069          | 0.123          | 0.903               |
|                  |                                                                                    | Frequency of occurrence at carcasses ILK:Experience $\geq$ 41 |           | 0.002           | 0.068          | 0.028          | 0.978               |
|                  | <b>SK-ILK</b>                                                                      | <b>Analysis of covariance table</b>                           | <b>DF</b> | <b>Sum</b>      | <b>Sq mean</b> | <b>F value</b> | <b>Pr (&gt;F)</b>   |
|                  | Biomass consumed SK- Scavenging service ILK                                        | Scavenging service ILK                                        | 1         | 18.726          | 18.726         | 15.067         | < <b>0.001</b>      |
|                  |                                                                                    | Experience                                                    | 2         | 0.068           | 0.034          | 0.027          | 0.973               |
|                  |                                                                                    | Scavenging service ILK:Experience                             | 2         | 0.145           | 0.073          | 0.059          | 0.943               |
|                  |                                                                                    | Residuals                                                     | 32        | 39.772          | 1.243          |                |                     |
|                  |                                                                                    | <b>Estimated coefficients</b>                                 |           | <b>Estimate</b> | <b>SE</b>      | <b>t value</b> | <b>Pr (&gt; t )</b> |
|                  |                                                                                    | Intercept                                                     |           | 0.067           | 0.448          | 0.149          | 0.883               |
|                  |                                                                                    | Scavenging service ILK                                        |           | 0.357           | 0.172          | 2.081          | <b>0.046</b>        |
|                  |                                                                                    | Experience 21-40                                              |           | -0.124          | 0.633          | -0.196         | 0.846               |
|                  |                                                                                    | Experience $\geq$ 41                                          |           | -0.185          | 0.631          | -0.293         | 0.772               |
|                  |                                                                                    | Scavenging service ILK:Experience 21-40                       |           | 0.012           | 0.239          | 0.052          | 0.959               |
|                  |                                                                                    | Scavenging service ILK:Experience $\geq$ 41                   |           | 0.079           | 0.248          | 0.319          | 0.752               |



**Table S6.** *U* values and *p* value of Mann-Whitney *U* tests ( $\alpha = 0.05$ ) of the differences between scientific knowledge (SK) and indigenous and local knowledge (ILK) about detection and consumption times of livestock carcasses by scavengers depending on shepherds' age ('born') and experience ('experience') in each study area. Significant differences between SK–ILK within the same study area are indicated in bold. Description of the variables is provided in Table S2 and S3. Mean and SD of detection and consumption times are provided in Figs. 3c–f.

| <b>Study area</b>    | <b>Born</b>       | <b>Variable SK – Variable ILK</b>                 |                |                                                       |                 |
|----------------------|-------------------|---------------------------------------------------|----------------|-------------------------------------------------------|-----------------|
|                      |                   | <i>Detection time SK –<br/>Detection time ILK</i> |                | <i>Consumption time SK –<br/>Consumption time ILK</i> |                 |
|                      |                   | <i>U</i>                                          | <i>p value</i> | <i>U</i>                                              | <i>p value</i>  |
| Cantabrian Mountains | ≤1950             | 15.0                                              | 0.498          | 33.0                                                  | < <b>0.001</b>  |
|                      | 1960              | 7.0                                               | 0.149          | 21.0                                                  | <b>0.003</b>    |
|                      | ≥1970             | 23.0                                              | 0.599          | 22.0                                                  | < <b>0.001</b>  |
| Baetic Mountains     | ≤1950             | 9.5                                               | <b>0.011</b>   | 34.0                                                  | 0.432           |
|                      | 1960              | 207.0                                             | 0.666          | 30.0                                                  | < <b>0.0001</b> |
|                      | ≥1970             | 175.0                                             | 0.204          | 24.0                                                  | < <b>0.001</b>  |
|                      | <b>Experience</b> |                                                   |                |                                                       |                 |
| Cantabrian Mountains | ≤20               | 20.0                                              | 0.650          | 24.0                                                  | < <b>0.001</b>  |
|                      | 21-40             | 10.0                                              | 0.164          | 28.0                                                  | < <b>0.0001</b> |
|                      | ≥41               | 15.0                                              | 0.498          | 24.0                                                  | <b>0.005</b>    |
| Baetic Mountains     | ≤20               | 86.0                                              | 0.600          | 34.0                                                  | 0.063           |
|                      | 21-40             | 177.0                                             | 0.390          | 19.0                                                  | < <b>0.0001</b> |
|                      | ≥41               | 128.5                                             | 0.102          | 35.0                                                  | < <b>0.0001</b> |

**Appendix S1.** Calculation of the biomass consumed (%) by each vertebrate scavenger species in each study area (see Mateo-Tomás et al. 2017 for further details).

First, for each study area (i.e., Cantabrian Mountains and Baetic Mountains), we estimated the carrion consumed by each vertebrate species scavenging at a carcass as:

$$Carrion\ consumed_i = \sum_{j=1}^{days} n_{ij} * DFI_i \quad \text{eq. (1)}$$

where  $n_{ij}$  is the abundance of species  $i$  recorded scavenging at a carcass (see above) on day  $j$ . This value was multiplied by the daily food intake of the species  $i$  (i.e.,  $DFI_i$ ) as resulting from the following equation (Crocker et al. 2002):

$$Daily\ Food\ Intake\ (DFI) = \frac{Daily\ Energy\ Expenditure\ (kJ)}{Food\ Energy\ \left(\frac{kJ}{g}\right) * (1 - Moisture) * Assimilation\ Efficiency} \quad \text{eq. (2)}$$

*Daily Energy Expenditure* has a strong relationship with body weight:

$$\log(Daily\ Energy\ Expenditure) = \log a + b * (\log Body\ weight) \quad \text{eq. (3)}$$

$\log a$  and  $b$  are parameters separately obtained from Hudson et al. (2013). Mean body weights for the recorded scavengers were obtained from official databases (i.e., PanTHERIA, HBW Alive; Jones et al. 2009; Del Hoyo et al. 2015). Energy and moisture content for mammal carrion were 22.6 kJ/g and 68.8% respectively (Crocker et al. 2002). Here, we assumed that each individual scavenger arriving at a carcass consumed the daily food intake.

Second, we estimated the percentage of biomass consumed per species  $i$  at each carcass  $c$  as:

$$Biomass\ consumed_i(\%) = \frac{Carrion\ consumed_{ci} * 100}{\sum_{i=1}^N (Carrion\ consumed_{ci})} \quad \text{eq. (4)}$$

Finally, we calculated the average biomass consumed (%) by each species at all the carcasses within each study area (i.e., the variable ‘biomass consumed SK’; see Table S3).

## References

- Crocker, D., A Hart, J. Gurney, and C. McCoy. 2002. *Project PN0908: Methods for estimating daily food intake of wild birds and mammals*. Final report. Central Science Laboratory. UK: DEFRA.
- Del Hoyo, J., A., Elliott, J., Sargatal, D.A., Christie, and E. de Juana. (Eds.). 2015. *Handbook of the Birds of the World Alive*. Barcelona: Lynx Edicions. Retrieved 1 October, 2016, from: <http://www.hbw.com/>
- Hudson, L.N, N.J.B. Isaac, and D.C. Reuman. 2013. The relationship between body mass and field metabolic rate among individual birds and mammals. *Journal of Animal Ecology* 82: 1009–1020. doi: 10.1111/1365-2656.12086
- Jones, K.E., J. Bielby, M. Cardillo, S. A. Fritz, J. O'Dell, C. D. L. Orme, K. Safi, W. Sechrest, et al. 2009. PanTHERIA: a species-level database of life history, ecology, and geography of extant and recently extinct mammals. *Ecology* 90: 2648–2648. doi:10.1890/08-1494.1
- Mateo-Tomás, P., P.P. Olea, M. Moleón, J. Vicente, F. Botella, N. Selva, J. Viñuela, and J.A. Sánchez-Zapata. 2015. From regional to global patterns in vertebrate scavenger communities subsidized by big game hunting. *Diversity and Distributions* 21: 913–924. doi: 10.1111/ddi.12330
- Mateo-Tomás, P., P.P. Olea, M. Moleón, N. Selva, and J.A. Sánchez-Zapata. 2017. Both rare and common species support ecosystem services in scavenger communities. *Global Ecology and Biogeography* 26: 1459-1470. doi: 10.1111/geb.12673
- Moleón, M., J.A. Sánchez-Zapata, E. Sebastián-González, and N. Owen-Smith. 2015. Carcass size shapes the structure and functioning of an African scavenging assemblage. *Oikos* 124: 1391–1403. doi: 10.1111/oik.02222
